# Supplementary material for: Cross-Platform Reproducible Modeling of Breast Cancer Prognosis Using the Core-PAM50 Gene Signature
Source: Research Square preprint supplement (doi:10.21203/rs.3.rs-8048795/v1), 2025-12-19
Supplement: Supplementary file 1 [file 2433227b4722d3ae286a3088.docx]

| **Gene** | **β** | **HR (exp β)** | **Biological role** | **Direction of risk** |
| --- | --- | --- | --- | --- |
| MKI67 | +0.235 | 1.26 | Proliferation marker | High-risk |
| UBE2C | +0.220 | 1.25 | Cell cycle regulation | High-risk |
| CCNB1 | +0.198 | 1.22 | Mitosis | High-risk |
| CEP55 | +0.170 | 1.19 | Cytokinesis | High-risk |
| ACTR3B | +0.160 | 1.17 | Cytoskeletal organization | High-risk |
| TYMS | +0.145 | 1.16 | DNA synthesis enzyme | High-risk |
| PHGDH | +0.120 | 1.13 | Metabolic enzyme | High-risk |
| FGFR4 | +0.110 | 1.12 | Growth factor receptor | High-risk |
| ERBB2 | +0.095 | 1.10 | HER2 pathway | High-risk |
| FOXC1 | +0.085 | 1.09 | Transcription factor | High-risk |
| ESR1 | −0.210 | 0.81 | Estrogen receptor | Low-risk |
| PGR | −0.190 | 0.83 | Progesterone receptor | Low-risk |
| BCL2 | −0.150 | 0.86 | Anti-apoptotic protein | Low-risk |
| BAG1 | −0.140 | 0.87 | Co-chaperone / luminal marker | Low-risk |
| NAT1 | −0.120 | 0.89 | Hormone metabolism | Low-risk |
| MAPT | −0.110 | 0.90 | Microtubule stability | Low-risk |
| MDM2 | −0.095 | 0.91 | p53 regulator | Low-risk |
| SLC39A6 | −0.090 | 0.91 | Zinc transporter | Low-risk |
| BLM | −0.070 | 0.93 | DNA helicase | Low-risk |
| MLPH | −0.060 | 0.94 | Melanophilin (luminal gene) | Low-risk |
