# Supplementary material for: Cross-Platform Reproducible Modeling of Breast Cancer Prognosis Using the Core-PAM50 Gene Signature
Source: Research Square preprint supplement (doi:10.21203/rs.3.rs-8048795/v1), 2025-12-19
Supplement: Supplementary file 2 [file 4603729cbc35816db4ee1200.docx]

| **Original PAM50 Gene** | **Included in core-PAM50?** | **Reason if excluded** |
| --- | --- | --- |
| KRT5 | No | Not detected on all platforms |
| KRT14 | No | Absent in Affymetrix GSE25066 |
| KRT17 | No | Alias inconsistencies across cohorts |
| MMP11 | No | Unreliable detection in TCGA |
| SFRP1 | No | Platform dropout (Illumina HT-12) |
| GRB7 | No | Missing probe in GSE25066 |
| GPR160 | No | Poor cross-platform reproducibility |
| KRT6B | No | Not consistently annotated |
| RPLP2 | No | Weak expression signal |
| NDC80 | No | Overlapping probe ambiguity |
| ACTR3B | Yes | Retained |
| BAG1 | Yes | Retained |
| BCL2 | Yes | Retained |
| BLM | Yes | Retained |
| CCNB1 | Yes | Retained |
| CEP55 | Yes | Retained |
| ERBB2 | Yes | Retained |
| ESR1 | Yes | Retained |
| FGFR4 | Yes | Retained |
| FOXC1 | Yes | Retained |
| MAPT | Yes | Retained |
| MDM2 | Yes | Retained |
| MKI67 | Yes | Retained |
| MLPH | Yes | Retained |
| NAT1 | Yes | Retained |
| PGR | Yes | Retained |
| PHGDH | Yes | Retained |
| SLC39A6 | Yes | Retained |
| TYMS | Yes | Retained |
| UBE2C | Yes | Retained |
