# Supplementary material for: Cross-Platform Reproducible Modeling of Breast Cancer Prognosis Using the Core-PAM50 Gene Signature
Source: Research Square preprint supplement (doi:10.21203/rs.3.rs-8048795/v1), 2025-12-19
Supplement: Supplementary file 3 [file 90e34b6a8234651e81ede5c3.docx]

| **Metric** | **Description / Value** |
| --- | --- |
| Training cohort | METABRIC (n = 1,980, Overall Survival endpoint) |
| Penalization method | LASSO-penalized Cox regression (α = 1) |
| Optimal λ | λ_min = 0.0129 |
| Number of genes retained | 20 of 40 (core-PAM50) |
| Internal C-index | 0.584 |
| RSF OOB C-index | 0.585 |
| Main biological axes | Proliferation (MKI67, UBE2C, CCNB1, CEP55) ↑ / Hormonal signaling (ESR1, PGR, BCL2, BAG1) ↓ |
| Hazard ratio (High vs Low risk) | ≈ 2.0 (p < 0.001) |
| Calibration (5-year OS) | Excellent agreement (slope ≈ 1.0) |
| Cross-validation stability | Flat deviance curve around λ_min; no overfitting detected |
| Interpretation | 20-gene model defines a reproducible luminal–proliferative risk axis within PAM50 biology. |
