# Supplementary material for: Cross-Platform Reproducible Modeling of Breast Cancer Prognosis Using the Core-PAM50 Gene Signature
Source: Research Square preprint supplement (doi:10.21203/rs.3.rs-8048795/v1), 2025-12-19
Supplement: Supplementary file 4 [file f8e0075d378805b0d7e4a124.docx]

| **Cohort** | **Endpoint** | **HR (High vs Low) [95 % CI]** | **p-value** | **C-index** | **AUC (5 years)** | **Calibration (slope/intercept)** | **Notes** |
| --- | --- | --- | --- | --- | --- | --- | --- |
| METABRIC | Overall Survival | 2.0 [1.5–2.5] | < 0.001 | 0.584 | 0.605 | 1.0 / 0.0 | Training set |
| TCGA-BRCA | Overall Survival | 1.1 [0.67–1.19] | 0.45 | 0.42 | 0.60 | 0.9 / 0.1 | Short follow-up; low event rate |
| GSE25066 | Disease-Free Survival | 2.0 [1.4–2.9] | < 0.001 | 0.63 | 0.63 | 1.1 / 0.0 | Chemotherapy cohort |
| Combined (meta) | Pooled estimate | 1.5 [1.1–2.1] | 0.01 | — | — | — | Fixed-effect model |
